# Supplementary material for: Photocatalytic and Electrocatalytic Properties of Cu-Loaded ZIF-67-Derivatized Bean Sprout-Like Co-TiO2/Ti Nanostructures
Source: MDPI journal article supplement (doi:10.3390/nano11081904), 2021-07-24
Supplement: s1 [file s1]

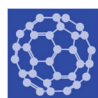

Supplemental Information

# Photocatalytic and Electrocatalytic Properties of Cu-Loaded ZIF-67-Derivatized Bean Sprout-Like Co-TiO<sub>2</sub>/Ti Nanostructures

Hye Ji Jang <sup>1,2</sup>, So Jeong Park <sup>1</sup>, Ju Hyun Yang <sup>1,2</sup>, Sung-Min Hong <sup>1,2</sup>, Choong Kyun Rhee <sup>1</sup> and Youngku Sohn <sup>1,2,\*</sup>

<sup>1</sup> Department of Chemistry, Chungnam National University, Daejeon 34134, Korea; gpwldndud@naver.com (H.J.J.); jsjs5921@naver.com (S.J.P.); mil03076@naver.com (J.H.Y.); qwqe212@naver.com (S.-M.H.); ckrhee@cnu.ac.kr (C.K.R.)

<sup>2</sup> Department of Chemical Engineering and Applied Chemistry, Chungnam National University, Daejeon 34134, Korea

\* Correspondence: youngkusohn@cnu.ac.kr; Tel.: +82-(42)-8216548

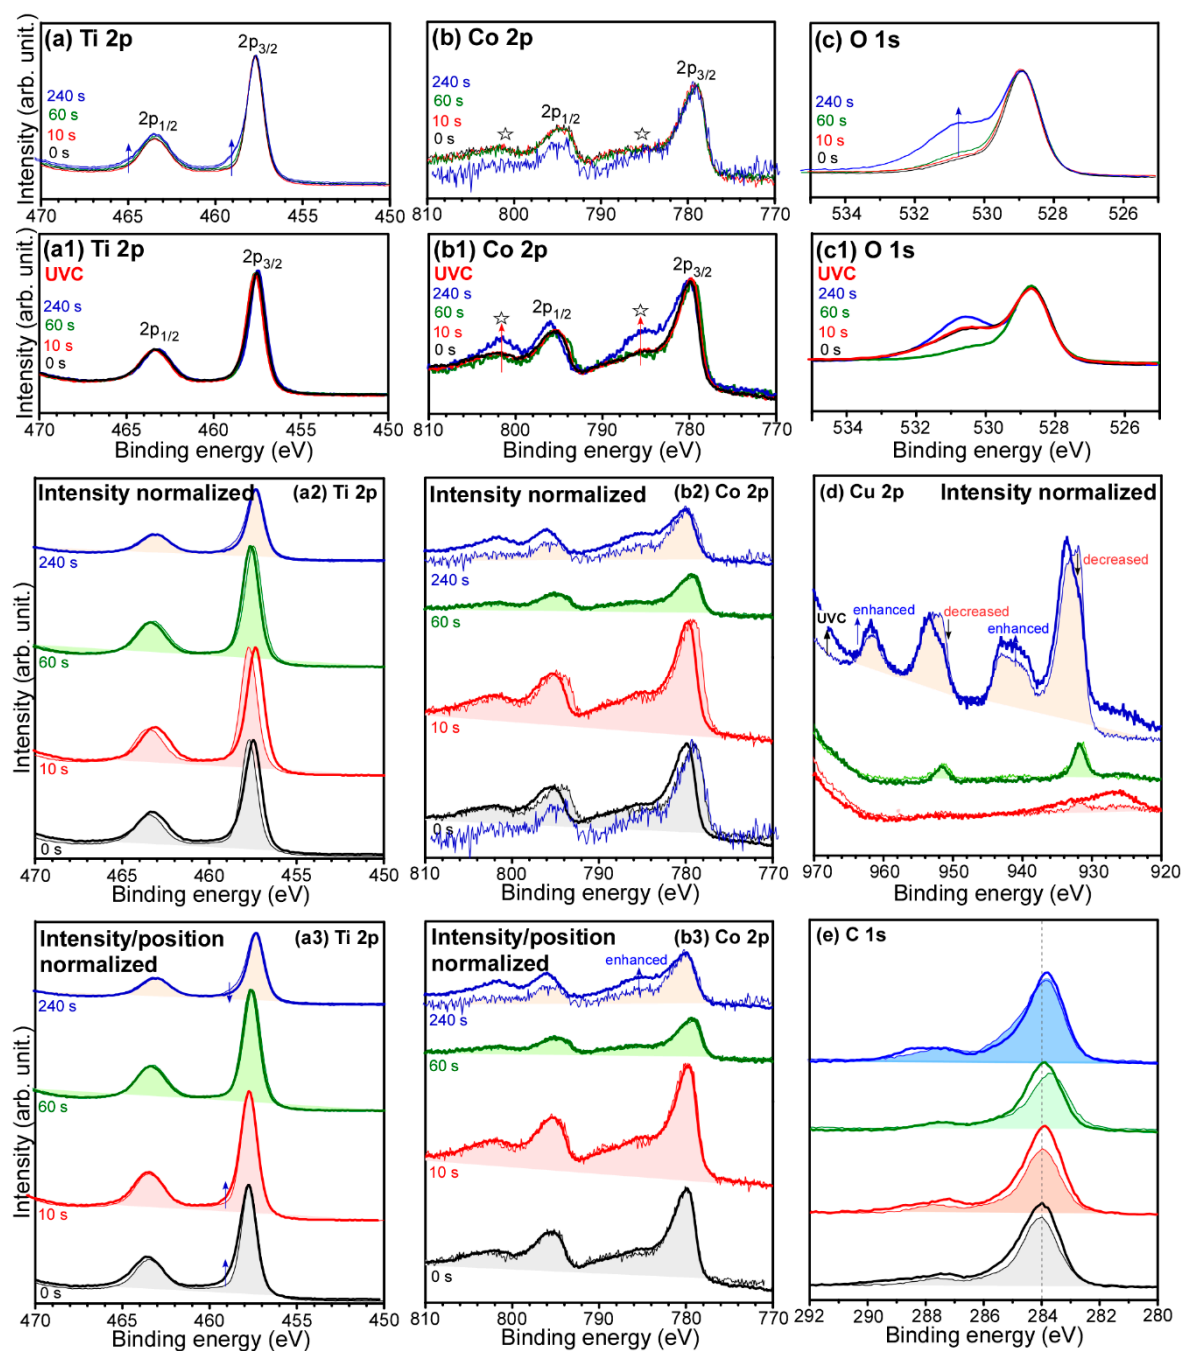

**Figure S1.** Normalized Ti 2p (a and a1), Co 2p (b and b1) and O 1s (c and c1) XPS profiles with Cu deposition time before and after UV CO<sub>2</sub> reduction, respectively, intensity-normalized (a2, b2 and d), and intensity (and peak position)-normalized (a3 and b3) Ti 2p (a2 and a3), Co 2p (b2 and b3), and Cu 2p (d) XPS profiles with Cu deposition time before and after UV CO<sub>2</sub> reduction, respectively, and C 1s XPS profiles (e) with Cu deposition time before and after UV CO<sub>2</sub> reduction.

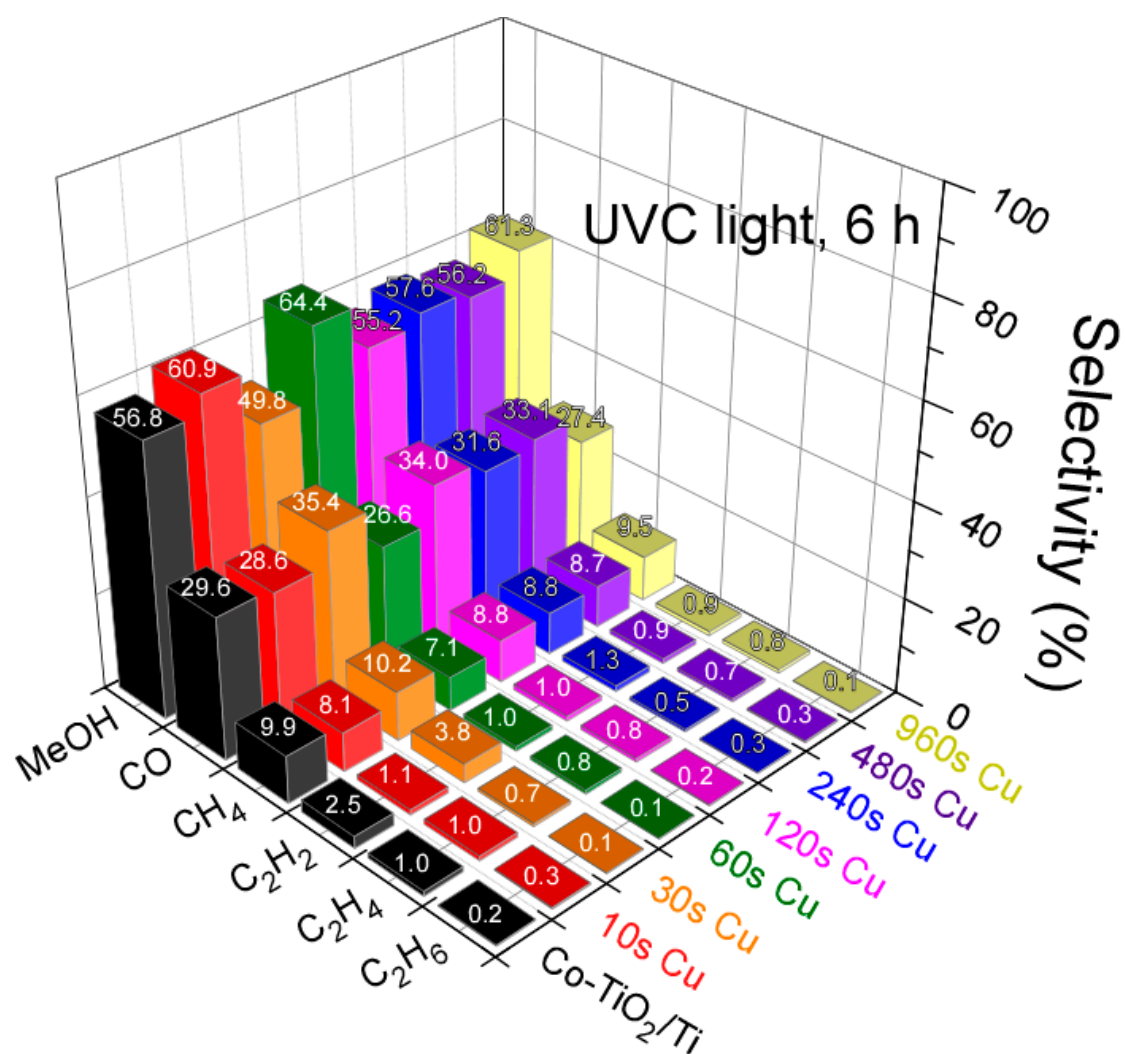

Figure S2. Photocatalytic CO<sub>2</sub> reduction selectivities.

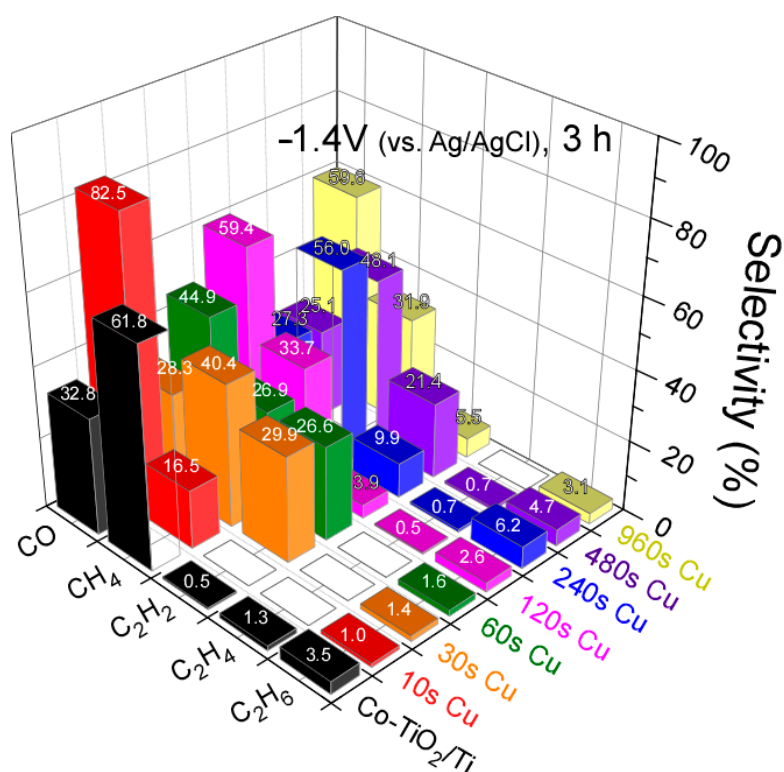

**Figure S3.** Electrocatalytic CO<sub>2</sub> reduction selectivities only with the C<sub>n</sub> compounds. The total production selectivity of C<sub>n</sub> compounds was less than 1% when compared with H<sub>2</sub>. All the catalysts showed a H<sub>2</sub> production selectivity of >99%.

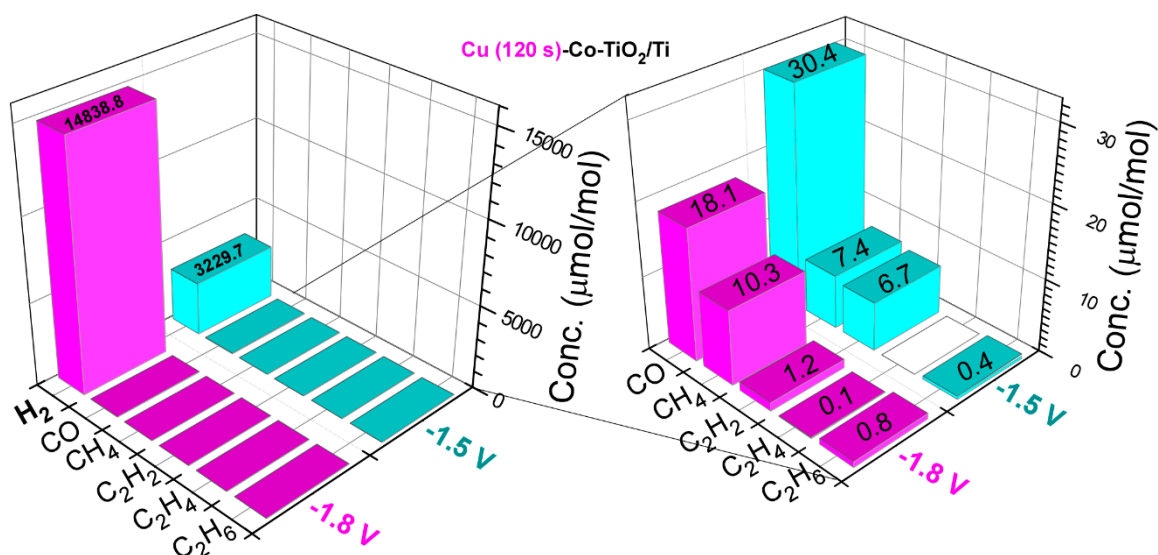

**Figure S4.** Electrochemical CO<sub>2</sub> reduction product yields at −1.5 V and −1.8 V for Cu (120 s)-Co-TiO<sub>2</sub>/Ti catalysts. The right graph is the rescaled version for the products with low yields.
